# Supplementary material for: Ball Python Nidovirus: a Candidate Etiologic Agent for Severe Respiratory Disease in Python regius
Source: PubMed Central journal article supplement — mBio. 2014 Sep 9;5(5):e01484-14. doi: 10.1128/mBio.01484-14 (PMC4173777; doi:10.1128/mbio.01484-14), 2014-09-09
Supplement: mbo004141959sf01.pdf [file mbo004141959sf01.pdf]

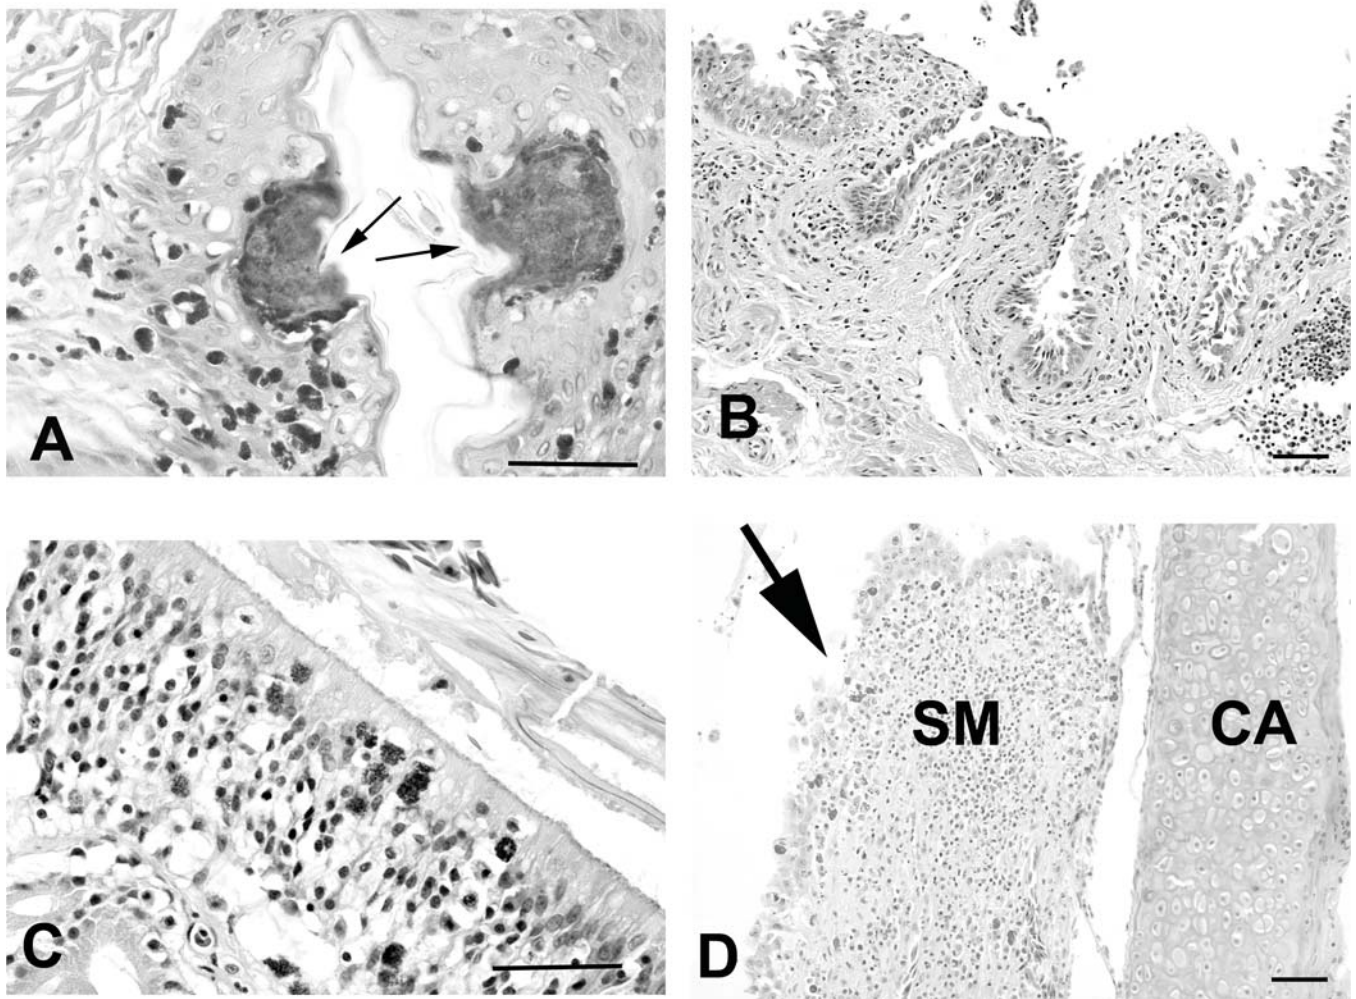

**Supplemental Figure 1. Representative microscopic lesions in upper respiratory tract** (A) Common wild type ball python (No. 7), *Python regius*. Photomicrograph of the oral mucosa revealing a mild to moderate stomatitis. There is a focal area of necrosis (arrows) and heterophilic inflammation in oral mucosa. H&E stain; Bar=100  $\mu$ m. (B) Cinnamon variant ball python (No. 8), *Python regius*. Photomicrograph of the oral mucosa. There is diffuse necrosis of the oro-pharyngeal mucosa with numerous lymphocytes and fewer plasma cells and macrophages infiltrating the submucosa. H&E stain; Bar= 75  $\mu$ m. (C) Common wild type ball python (No. 7), *Python regius*. Photomicrograph of a nasal cavity revealing mild heterophilic and lymphocytic inflammation in sinus mucosa. (D) Cinnamon variant ball python (No. 8), *Python regius*. Photomicrograph of the tracheal mucosa revealing areas of hyperplasia and necrosis (arrow). The submucosa (SM) is severely and diffusely thickened, primarily with round cells. Cartilage (CA) surrounds the submucosa. H&E stain; Bar=75  $\mu$ m.
