# Supplementary material for: Ball Python Nidovirus: a Candidate Etiologic Agent for Severe Respiratory Disease in Python regius
Source: PubMed Central journal article supplement — mBio. 2014 Sep 9;5(5):e01484-14. doi: 10.1128/mBio.01484-14 (PMC4173777; doi:10.1128/mbio.01484-14), 2014-09-09
Supplement: mbo004141959sf02.pdf [file mbo004141959sf02.pdf]

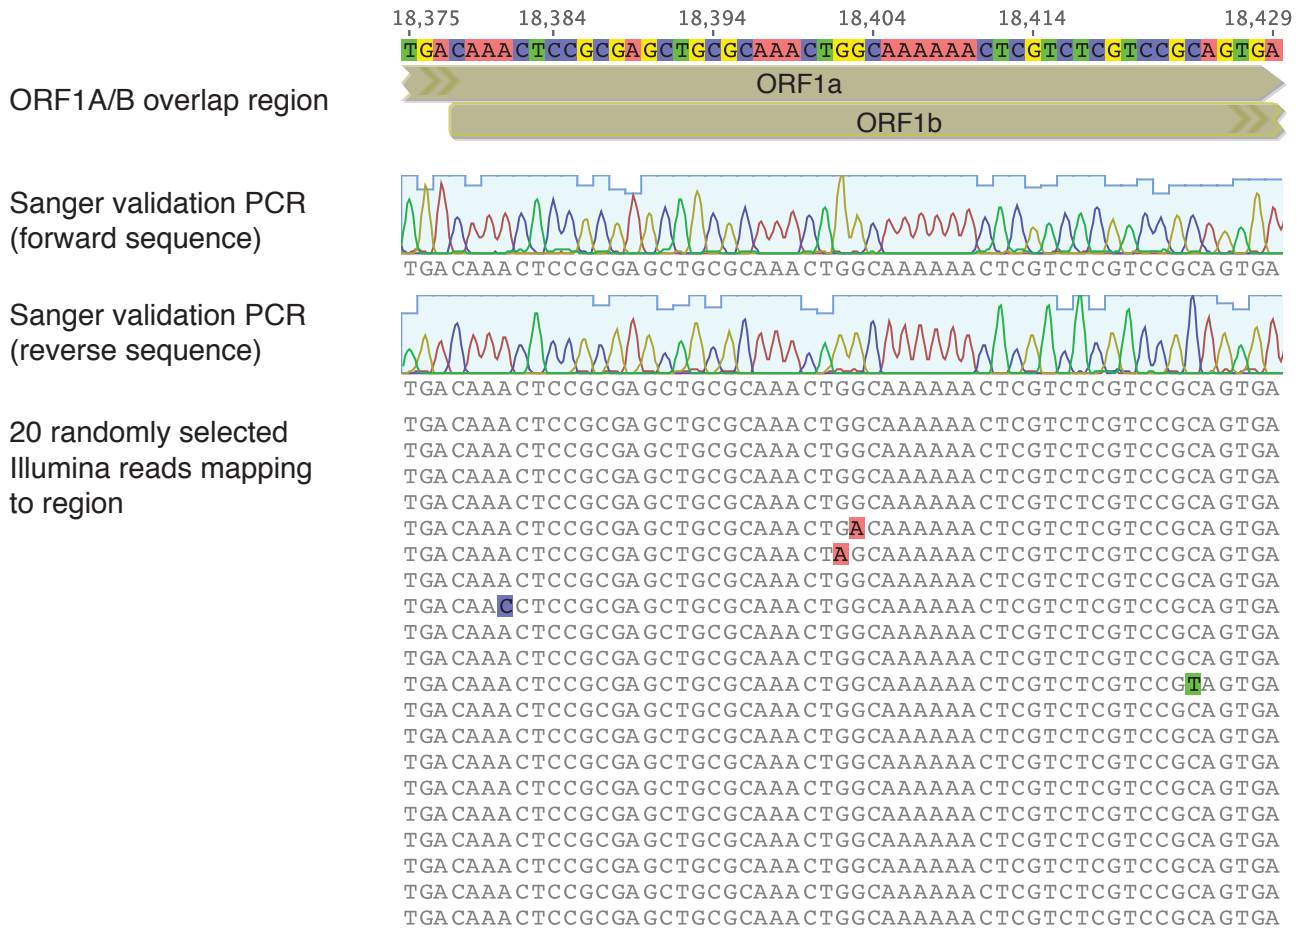

**Supplemental Figure 2:** The putative AAAAAAC “slippery sequence” in region of ORF1a/b overlap is well supported by Illumina and Sanger sequencing. The 55 nt region of overlap between ORF1a and ORF1b is shown as are Sanger and Illumina sequences mapping to this region. Bases are numbered according to the overall genomic position. Sanger sequences are from directly sequenced PCR products. 20 randomly-selected Illumina reads (from 85x average coverage) are depicted and disagreements to the consensus sequence are highlighted.
