# Supplementary material for: Ball Python Nidovirus: a Candidate Etiologic Agent for Severe Respiratory Disease in Python regius
Source: PubMed Central journal article supplement — mBio. 2014 Sep 9;5(5):e01484-14. doi: 10.1128/mBio.01484-14 (PMC4173777; doi:10.1128/mbio.01484-14), 2014-09-09
Supplement: mbo004141959sf03.pdf [file mbo004141959sf03.pdf]

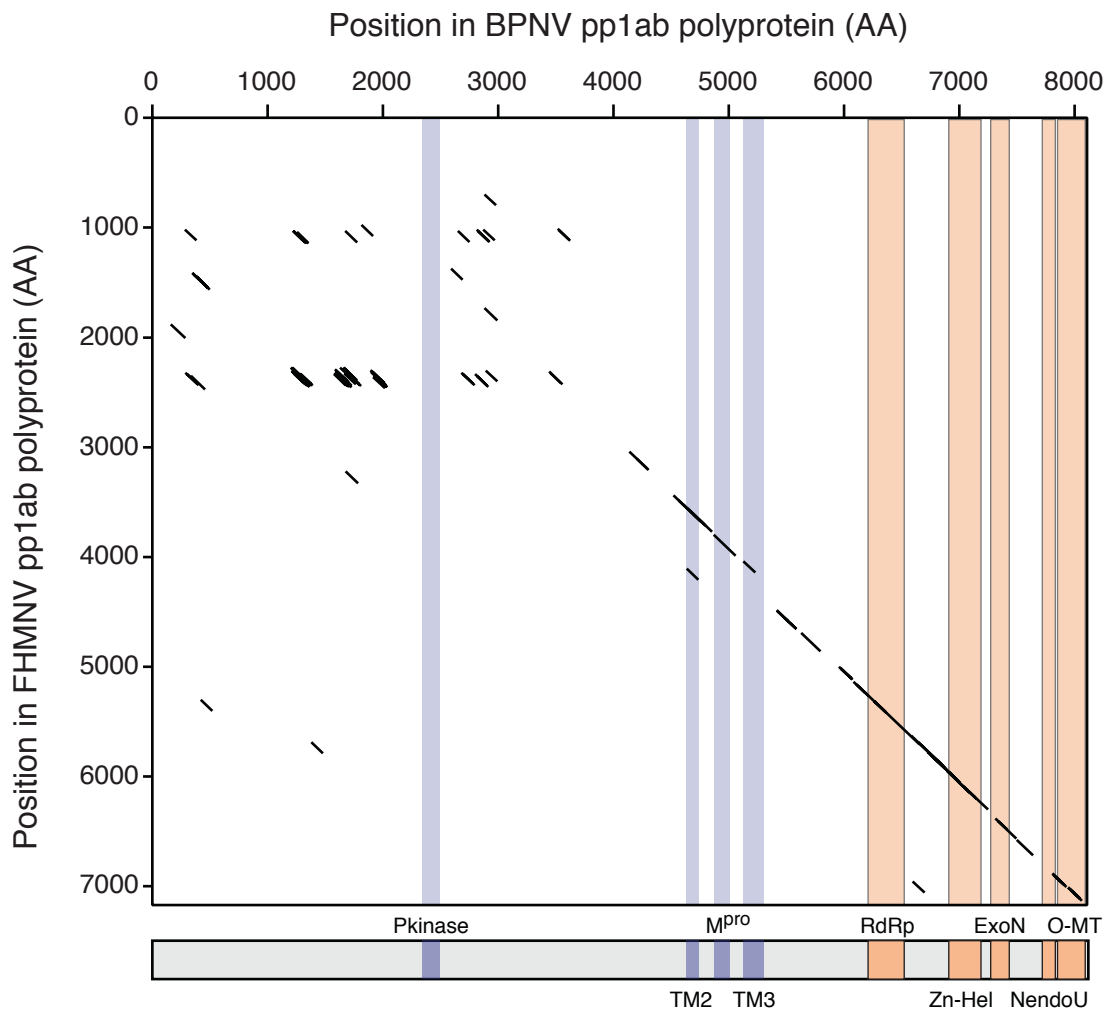

**Supplemental Figure 3A:** Dotplot showing regions of similarity between ball python nidovirus (BPNV) and fathead minnow nidovirus (FHMNV) replicase polyproteins. Lines in dotplot represent 100 amino acid windows with pairwise global alignment scores of  $\geq 40$  (BLOSUM50 matrix). A cartoon of the BPNV pp1ab with predicted functional domains highlighted (see text) with highlighting extended into dotplot. Blue and orange colors correspond to ORF1a and ORF1b encoded domains.

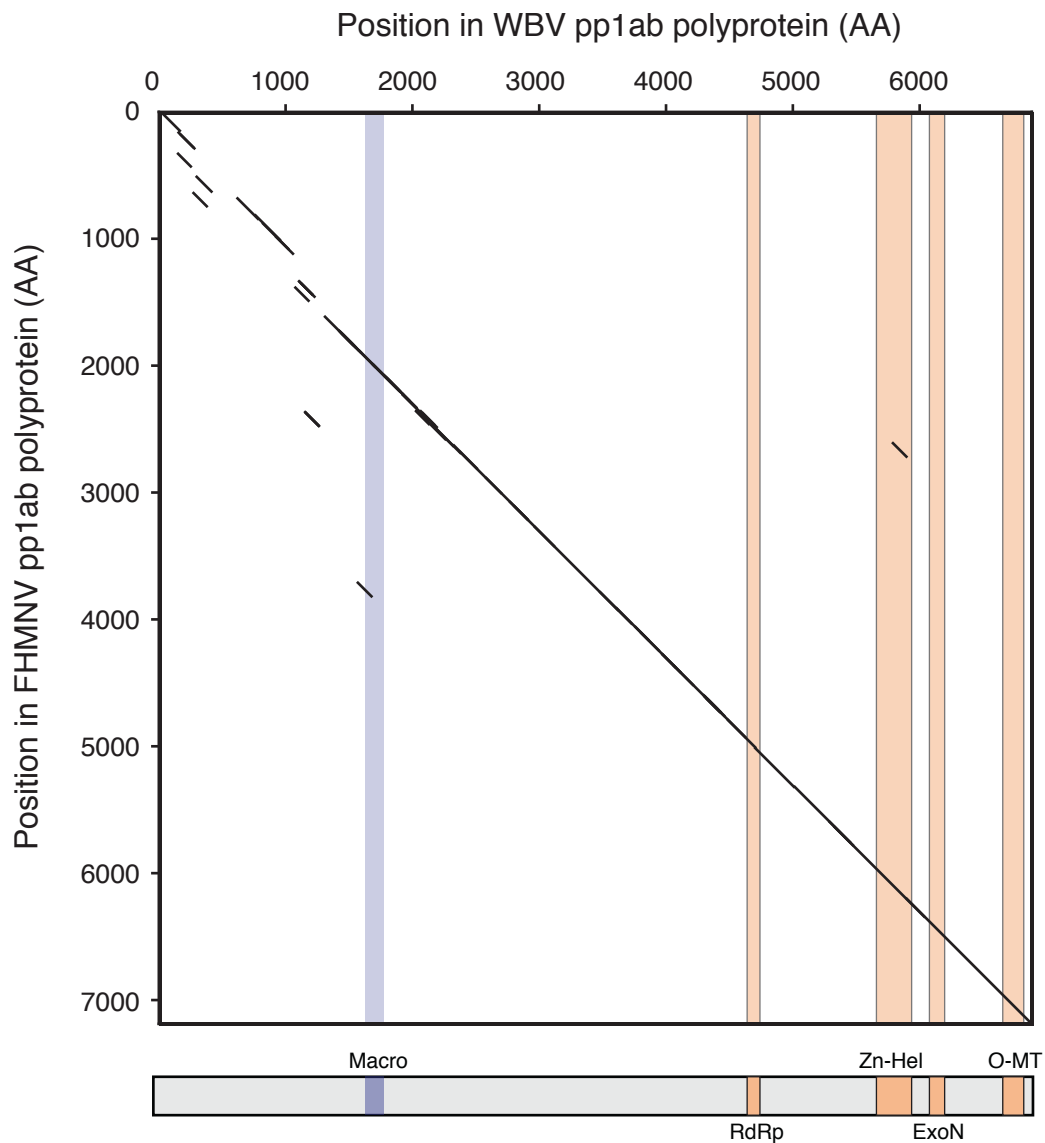

**Supplemental Figure 3B:** Dotplot showing regions of similarity between white bream virus (WBV) and fathead minnow nidovirus (FHMNV) replicase polyproteins. Lines in dotplot represent 100 amino acids windows with pairwise global alignment scores of  $\geq 40$  (BLOSUM50 matrix). A cartoon of the WBV pp1ab with functional domains highlighted (annotations according to Genbank YP\_803213.1) with highlighting extended into dotplot. Blue and orange colors correspond to ORF1a and ORF1b encoded domains.
