# Supplementary material for: Ball Python Nidovirus: a Candidate Etiologic Agent for Severe Respiratory Disease in Python regius
Source: PubMed Central journal article supplement — mBio. 2014 Sep 9;5(5):e01484-14. doi: 10.1128/mBio.01484-14 (PMC4173777; doi:10.1128/mbio.01484-14), 2014-09-09
Supplement: mbo004141959sf04.pdf [file mbo004141959sf04.pdf]

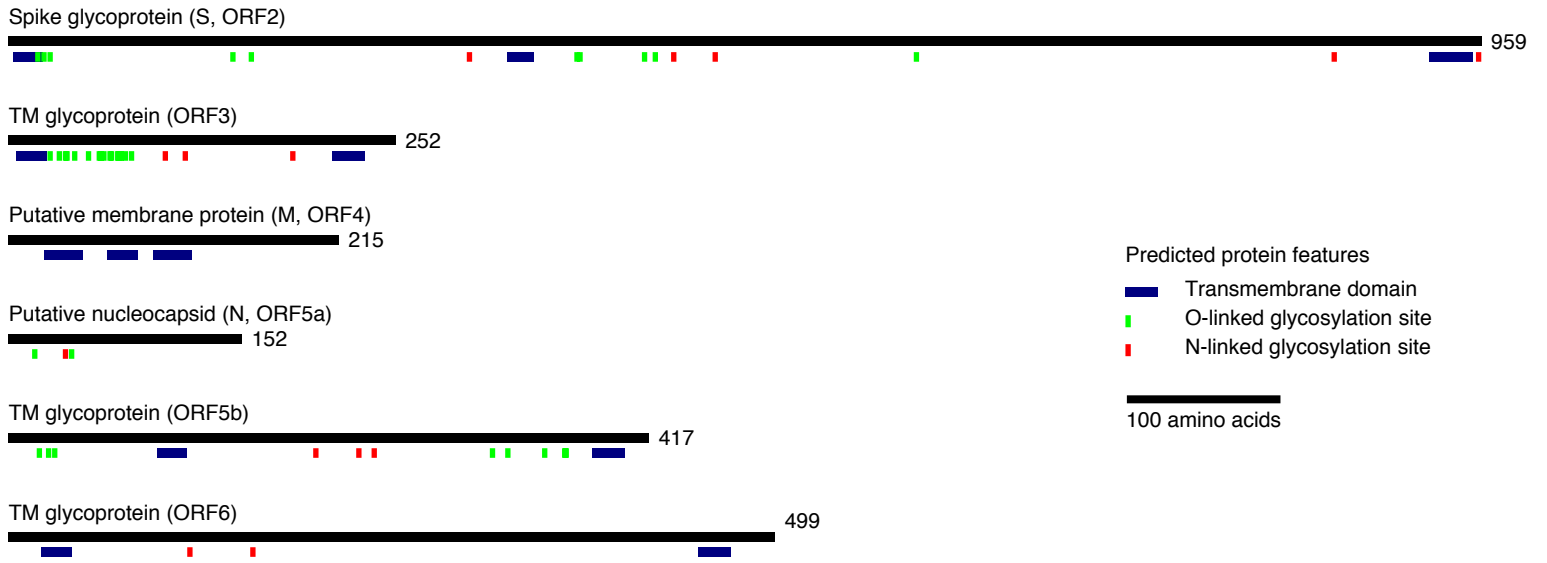

**Supplemental Figure 4:** Transmembrane domains and glycosylation sites in proteins predicted to be encoded by ORF2 - ORF6 of snake nidovirus. Domains and glycosylation sites were predicted as described in text. Predicted protein lengths are indicated.
