# Supplementary material for: Ball Python Nidovirus: a Candidate Etiologic Agent for Severe Respiratory Disease in Python regius
Source: PubMed Central journal article supplement — mBio. 2014 Sep 9;5(5):e01484-14. doi: 10.1128/mBio.01484-14 (PMC4173777; doi:10.1128/mbio.01484-14), 2014-09-09
Supplement: mbo004141959sf05.pdf [file mbo004141959sf05.pdf]

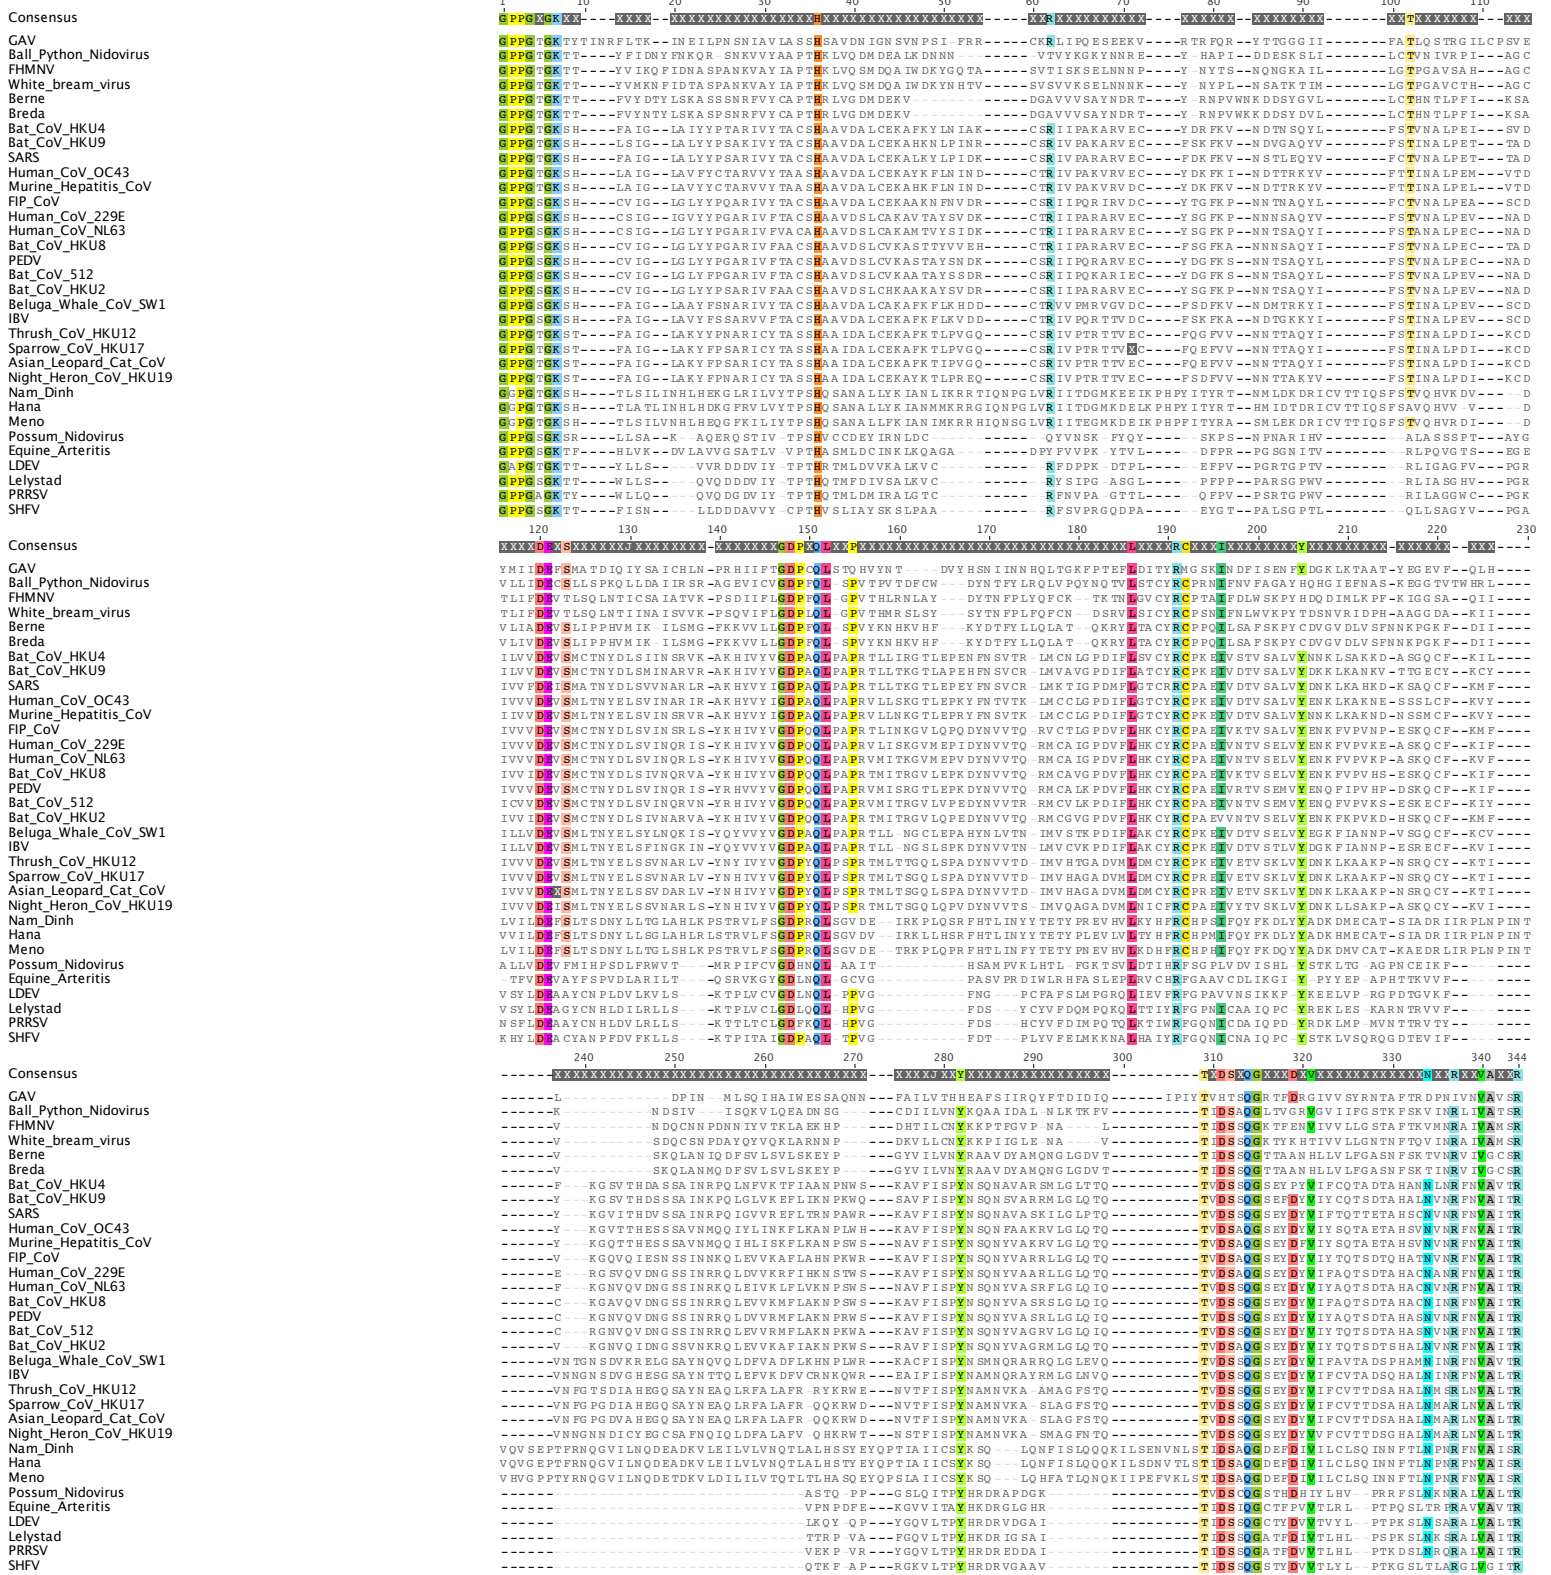

Supplemental Figure 5B: Multiple alignment of helicase domain of replicase polyprotein of indicated representative nidoviruses. Columns with >75% identity are highlighted.

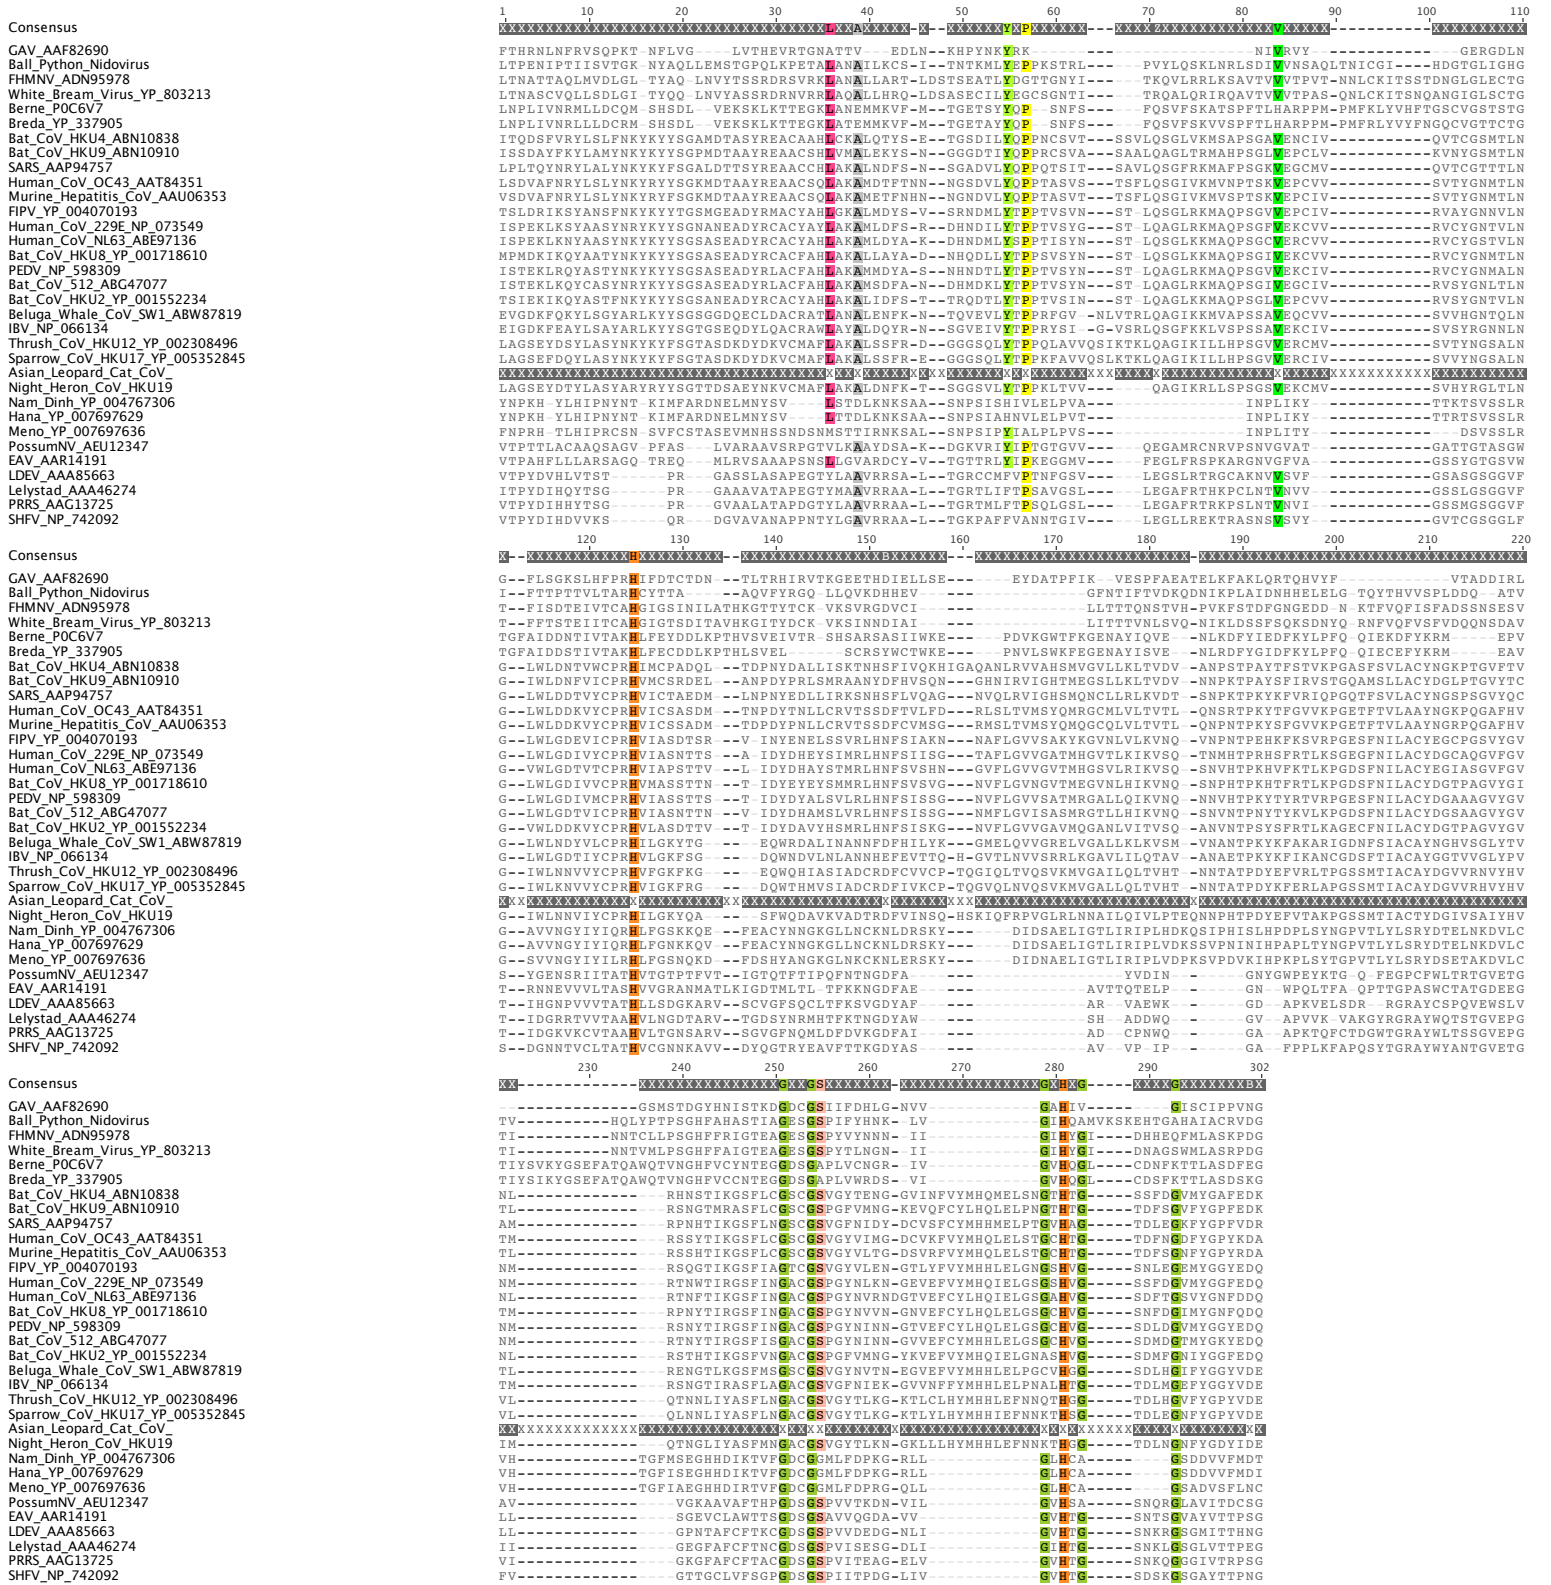

Supplemental Figure 5C: Multiple alignment of main 3C-like protease domain of replicase polypeptide of indicated representative nidoviruses. Columns with >75% identity are highlighted. Sequence accession numbers are indicated.
