# Supplementary material for: Ball Python Nidovirus: a Candidate Etiologic Agent for Severe Respiratory Disease in Python regius
Source: PubMed Central journal article supplement — mBio. 2014 Sep 9;5(5):e01484-14. doi: 10.1128/mBio.01484-14 (PMC4173777; doi:10.1128/mbio.01484-14), 2014-09-09
Supplement: mbo004141959st1.pdf [file mbo004141959st1.pdf]

Supplemental Table 1 - Oligonucleotides used in this study

| Oligo name  | Oligo sequence (5'-3')                                                | Notes                                  |
|-------------|-----------------------------------------------------------------------|----------------------------------------|
| MDS-286     | NNNNNN                                                                | Random hexamer - library prep          |
| Nextera1-bc | AATGATACGGGGACCCAGGATCTACAC<barcode>TCGTGGCAGCCTCAGATGTGTATAAAGAGACAG | Library prep - barcoded adapter 1      |
| Nextera2-bc | CAAGCAGAAAGCGGCATACGAGAT<barcode>GTCTGGGCTCGGAGATGTGTATAAAGAGACAG     | Library prep - barcoded adapter 2      |
| MDS-143     | CAAGCAGAAAGCGGCATACG                                                  | Library prep - 5' of adapter 2         |
| MDS-445     | AATGATACGGGGACCCAGC                                                   | Library prep - 5' of adapter 1         |
| MDS-479     | ATTCTCACCATCGGATCG                                                    | qPCR - ORF1B F                         |
| MDS-480     | TCGTGCTGCTTCGTACAC                                                    | qPCR - ORF1B R                         |
| MDS-481     | GCTCGAAGACAACCCAGAAG                                                  | qPCR - ORF1A F                         |
| MDS-482     | TTGCTGCGATGATACCTTTG                                                  | qPCR - ORF1A R                         |
| MDS-483     | CGCACCACTCATCAACATTC                                                  | qPCR - ORF2 F                          |
| MDS-484     | TACTCCATGCTGTGATCTGG                                                  | qPCR - ORF2 R                          |
| MDS-368     | ATGCCGCTTAGAGAAACCAG                                                  | qPCR - GAPDH F                         |
| MDS-369     | CAGCTGGCTTCACAACTTC                                                   | qPCR - GAPDH R                         |
| MDS-691     | CAACTGCTTGACCGCTTG                                                    | Genome sequencing L-1 / sgRNA analysis |
| MDS-692     | CAGGCCACCACTCTGCAA                                                    | Genome sequencing L-2 / sgRNA analysis |
| MDS-693     | AAGCTGGAACCCGCACTG                                                    | Genome sequencing L-3                  |
| MDS-694     | CACCGAAGAACCCACGAGC                                                   | Genome sequencing L-4                  |
| MDS-695     | GGTACCATTCAAGCCAGC                                                    | Genome sequencing L-5                  |
| MDS-696     | AGCTACTACCTTCGCGCA                                                    | Genome sequencing L-6                  |
| MDS-697     | CCACAACCGCAGCAGTATC                                                   | Genome sequencing L-7                  |
| MDS-698     | AGCGTCAACTTACCACCTCA                                                  | Genome sequencing L-8                  |
| MDS-699     | TCGTGTAGATTGGGAAATTGC                                                 | Genome sequencing L-9                  |
| MDS-700     | GCAGACCAGCAAGCACT                                                     | Genome sequencing L-10                 |
| MDS-701     | GCACCTTAAAGCAACGTGG                                                   | Genome sequencing L-11                 |
| MDS-702     | GACCACTCCCAACCAACGA                                                   | Genome sequencing L-12                 |
| MDS-703     | ACGTGGCTTCTCTGTGT                                                     | Genome sequencing R-1 / sgRNA analysis |
| MDS-704     | GCGGTGTGCTGGATAGT                                                     | Genome sequencing R-2                  |
| MDS-705     | TCGTGCTTTGAGGTGAGG                                                    | Genome sequencing R-3                  |
| MDS-706     | ACCGCTTTGATACGTFTGC                                                   | Genome sequencing R-4                  |
| MDS-707     | CTGTGTGTAGTCTGATCTG                                                   | Genome sequencing R-5                  |
| MDS-708     | GAGCTCAGTGGATTTGCC                                                    | Genome sequencing R-6                  |
| MDS-709     | CGCCGCTTGACTAGAT                                                      | Genome sequencing R-7                  |
| MDS-710     | ACTCCTCGTCCATGAACCA                                                   | Genome sequencing R-8                  |
| MDS-711     | AGCTCTCGAAGTGGCTGG                                                    | Genome sequencing R-9                  |
| MDS-712     | GGCGAGTGTGTGGCATC                                                     | Genome sequencing R-10                 |
| MDS-713     | CGGCTGGAGTTGGGTA                                                      | Genome sequencing R-11                 |
| MDS-714     | CGCGAAGCTGTCTCTGA                                                     | Genome sequencing R-12                 |
| MDS-715     | GGCTCGACAGCTACCAA                                                     | Genome sequencing L-13                 |
| MDS-716     | GCTCCGACGAAACACAT                                                     | Genome sequencing L-14                 |
| MDS-717     | GGACCTGCTCTTCAACG                                                     | Genome sequencing L-15                 |
| MDS-718     | CGAGGCACACTGTTGCAA                                                    | Genome sequencing L-16                 |
| MDS-719     | ACACTGTCTATTGCTTCGGT                                                  | Genome sequencing L-17                 |
| MDS-720     | GCACCTACAGCCCAAGAC                                                    | Genome sequencing L-18                 |
| MDS-721     | CTCACACTGCACAAACAG                                                    | Genome sequencing L-19                 |
| MDS-722     | AGCACTCCACAAGCACT                                                     | Genome sequencing L-20                 |
| MDS-723     | TCGCAGACTGGGAAATCC                                                    | Genome sequencing L-21                 |
| MDS-724     | CATCGTCAGGCCAATCC                                                     | Genome sequencing L-22                 |
| MDS-725     | AGCGCACCACACTATCT                                                     | Genome sequencing L-23                 |
| MDS-726     | TGACTGGGTGGCTGTCAA                                                    | Genome sequencing L-24                 |
| MDS-727     | GCTTCGATGACTCTGGCG                                                    | Genome sequencing R-13                 |
| MDS-728     | ATCACCATGGCGTGTGT                                                     | Genome sequencing R-14                 |
| MDS-729     | GAAGTGGCTGACGGTGT                                                     | Genome sequencing R-15                 |
| MDS-730     | GAAGTCCGATGGCATGG                                                     | Genome sequencing R-16                 |
| MDS-731     | TGGTCTGAGGATGCGTCT                                                    | Genome sequencing R-17                 |
| MDS-732     | TGCCATGTCAACGAAAT                                                     | Genome sequencing R-18                 |
| MDS-733     | CCCGGTGTCTTGGAGTGA                                                    | Genome sequencing R-19                 |
| MDS-734     | CAGCACAAAGGGTATGCC                                                    | Genome sequencing R-20                 |
| MDS-735     | CGAGTTGGCGGAGTGA                                                      | Genome sequencing R-21                 |
| MDS-736     | CGATGCCGTGTGTGAGT                                                     | Genome sequencing R-22                 |
| MDS-737     | CCTCCGATCTTGAAGTGA                                                    | Genome sequencing R-23                 |
| MDS-738     | GCCTTCGAGAAATTAAGC                                                    | Genome sequencing R-24                 |
| MDS-739     | GAAACGCCAGCAGTGA                                                      | Genome sequencing L-25                 |
| MDS-740     | CCACAGCATGCACCATG                                                     | Genome sequencing L-26                 |
| MDS-741     | GCCGCTAAAGACTTGGGC                                                    | Genome sequencing L-27                 |
| MDS-742     | TGTGGCAGCAACTTCATCG                                                   | Genome sequencing L-28                 |
| MDS-743     | TCCTTTCACCCGAGCCCA                                                    | Genome sequencing L-29                 |
| MDS-744     | ACCATCGGTTTATGTTGGGA                                                  | Genome sequencing L-30                 |
| MDS-745     | TCACCTGCTGACGGAGC                                                     | Genome sequencing L-31                 |
| MDS-746     | GGTTACACGAAACTTCTGCT                                                  | Genome sequencing L-32                 |
| MDS-747     | TCCACCTTACCCTCGGA                                                     | Genome sequencing R-25                 |
| MDS-748     | GCTGTTGCGAGTCTTTGG                                                    | Genome sequencing R-26                 |
| MDS-749     | TGTAGCTTGTGATGCTGATGT                                                 | Genome sequencing R-27                 |
| MDS-750     | ACAGGGAACACAGCACCA                                                    | Genome sequencing R-28                 |
| MDS-751     | ACTGAGGATGGTAAACTGG                                                   | Genome sequencing R-29                 |
| MDS-752     | CCTAAGCCCACTCATAGAC                                                   | Genome sequencing R-30                 |
| MDS-753     | CGGTTAGGATTTCAACGGA                                                   | Genome sequencing R-31                 |
| MDS-754     | AAACTGGTTTATGCCGTCGG                                                  | Genome sequencing R-32                 |
| MDS-121     | CCAGTGAGCAGAGTGACGAGGACTCGAGCTCAAGCTTTTTTTTTTTTTTTTT                  | 5'/3' RACE Q1 - oligo-dT primer        |
| MDS-122     | CCAGTGAGCAGAGTGAGC                                                    | 5'/3' RACE Q0 - outer adapter primer   |
| MDS-123     | GAGGACTCGAGCTCAAGC                                                    | 5'/3' RACE Q1 - inner adapter primer   |
| MDS-755     | ATCGGGGTGGAGACTTTTG                                                   | 5' RACE / sgRNA analysis               |
| MDS-756     | GAGAGGGAGTTAGCCAAGGG                                                  | 5' RACE - nested 1                     |
| MDS-757     | GGTACACTGTTAACCAACAACT                                                | 5' RACE - nested 2                     |
| MDS-676     | AACGGAACTGAAGTGTGCC                                                   | 3' RACE                                |
| MDS-677     | TGTAGCCCTTCCCTGFTTG                                                   | 3' RACE - nested 1                     |
| MDS-678     | TGCCTAGACATTCGCTGTGT                                                  | 3' RACE - nested 2                     |
| MDS-681     | GTTACATCGCGGGTGTCTCA                                                  | sgRNA analysis - ORF7                  |
| MDS-683     | GGACAGTACTTGACCGCTA                                                   | sgRNA analysis - ORF5/6                |
| MDS-685     | CGGGAAGTGAACAAGTGGG                                                   | sgRNA analysis - ORF4                  |
| MDS-687     | AGCTGTGATGCTGATGTTGG                                                  | sgRNA analysis - ORF3                  |
| MDS-689     | TGGATCGACGTAGCTTGTGA                                                  | sgRNA analysis - ORF2                  |

adapter 1 barcode sequences: TGGTCTC, TCCAGTC, TAGCGTA, GCGATCA, AGCTACA, ACTCATC, TTGGCAG, AAGCGAC

adapter 2 barcode sequences (reverse complemented): TCGTTGG, GTGCTCT, TCCGTAT, TACGCTT, TACAACG, GAAGGAG, AAGCATC, TGAGATC
