# Supplementary material for: Ball Python Nidovirus: a Candidate Etiologic Agent for Severe Respiratory Disease in Python regius
Source: PubMed Central journal article supplement — mBio. 2014 Sep 9;5(5):e01484-14. doi: 10.1128/mBio.01484-14 (PMC4173777; doi:10.1128/mbio.01484-14), 2014-09-09
Supplement: mbo004141959st2.pdf [file mbo004141959st2.pdf]

**Supplemental Table 2: High throughput sequencing summary**

| Snake # | Tissue sequenced             | Barcode | Read pairs (a) | Unique read pairs (b) | Read pairs post filtering (c) | Fraction post filtering | Initial nidovirus BLASTx hit pairs (d) | Actual mapping nidovirus read pairs (e) | Average pairwise % identity to assembled genome (f) |
|---------|------------------------------|---------|----------------|-----------------------|-------------------------------|-------------------------|----------------------------------------|-----------------------------------------|-----------------------------------------------------|
| 1       | lung                         | TACGCTT | 869821         | 91038                 | 42403                         | 0.05                    | 0                                      | 21                                      | 99.9%                                               |
| 2       | lung                         | TCCGTAT | 5769942        | 396912                | 256392                        | 0.04                    | 92                                     | 12194                                   | 99.6%                                               |
| 5       | <i>Not sequenced</i>         |         |                |                       |                               |                         |                                        |                                         |                                                     |
| 6       | lung/liver/spleen            | GTGTCCT | 2737996        | 502585                | 125051                        | 0.05                    | 0                                      | 49                                      | 99.0%                                               |
| 7       | liver/lung/spleen            | TCGTTGG | 197203         | 13659                 | 2210                          | 0.01                    | 6                                      | 597                                     | 99.4%                                               |
| 8       | lung/brain                   | GAAGGAG | 2685821        | 300998                | 30592                         | 0.01                    | 3                                      | 152                                     | 95.7%                                               |
| 8       | liver/kidney/spleen/pancreas | TACAACG | 3942193        | 135701                | 13498                         | 0.00                    | 0                                      | 0                                       |                                                     |
| 9       | lung/trachea/liver           | AAGCATC | 4128179        | 198614                | 42020                         | 0.01                    | 1                                      | 148                                     | 95.2%                                               |
| 10      | lung                         | TGAGATC | 5632581        | 432622                | 59348                         | 0.01                    | 0                                      | 137                                     | 96.9%                                               |
| 11      | lung                         | ACACAAG | 151283         | 27544                 | 12220                         | 0.08                    | 0                                      | 126                                     | 97.0%                                               |

**Notes**

- (a) Number of initial read pairs
- (b) Number of read pairs after removing low quality and low complexity sequences, and collapsing non-unique sequences
- (c) Number read pairs remaining after filtering host-derived sequence, as described in text
- (d) Number of pairs where the best hit from a BLASTx search of nr database for both reads was to a nidovirus sequence w/ E-value < 1e-3
- (e) Number of read pairs from fully-filtered datasets mapping to ball python nidovirus assembly, determined using Bowtie2 alignment tool
- (f) Average % pairwise nucleotide identity of mapping read pairs to ball python nidovirus assembly (assembled from snake #2 reads)
